# Supplementary material for: Unilateral Ureteral Obstruction for 28 Days in Rats Is Not Associated with Changes in Cardiac Function or Alterations in Mitochondrial Function
Source: MDPI journal article supplement (doi:10.3390/biology10070671), 2021-07-16

## Uncropped blots: kidney markers

These immunoblots were used for the preparation of **Fig. 1G**

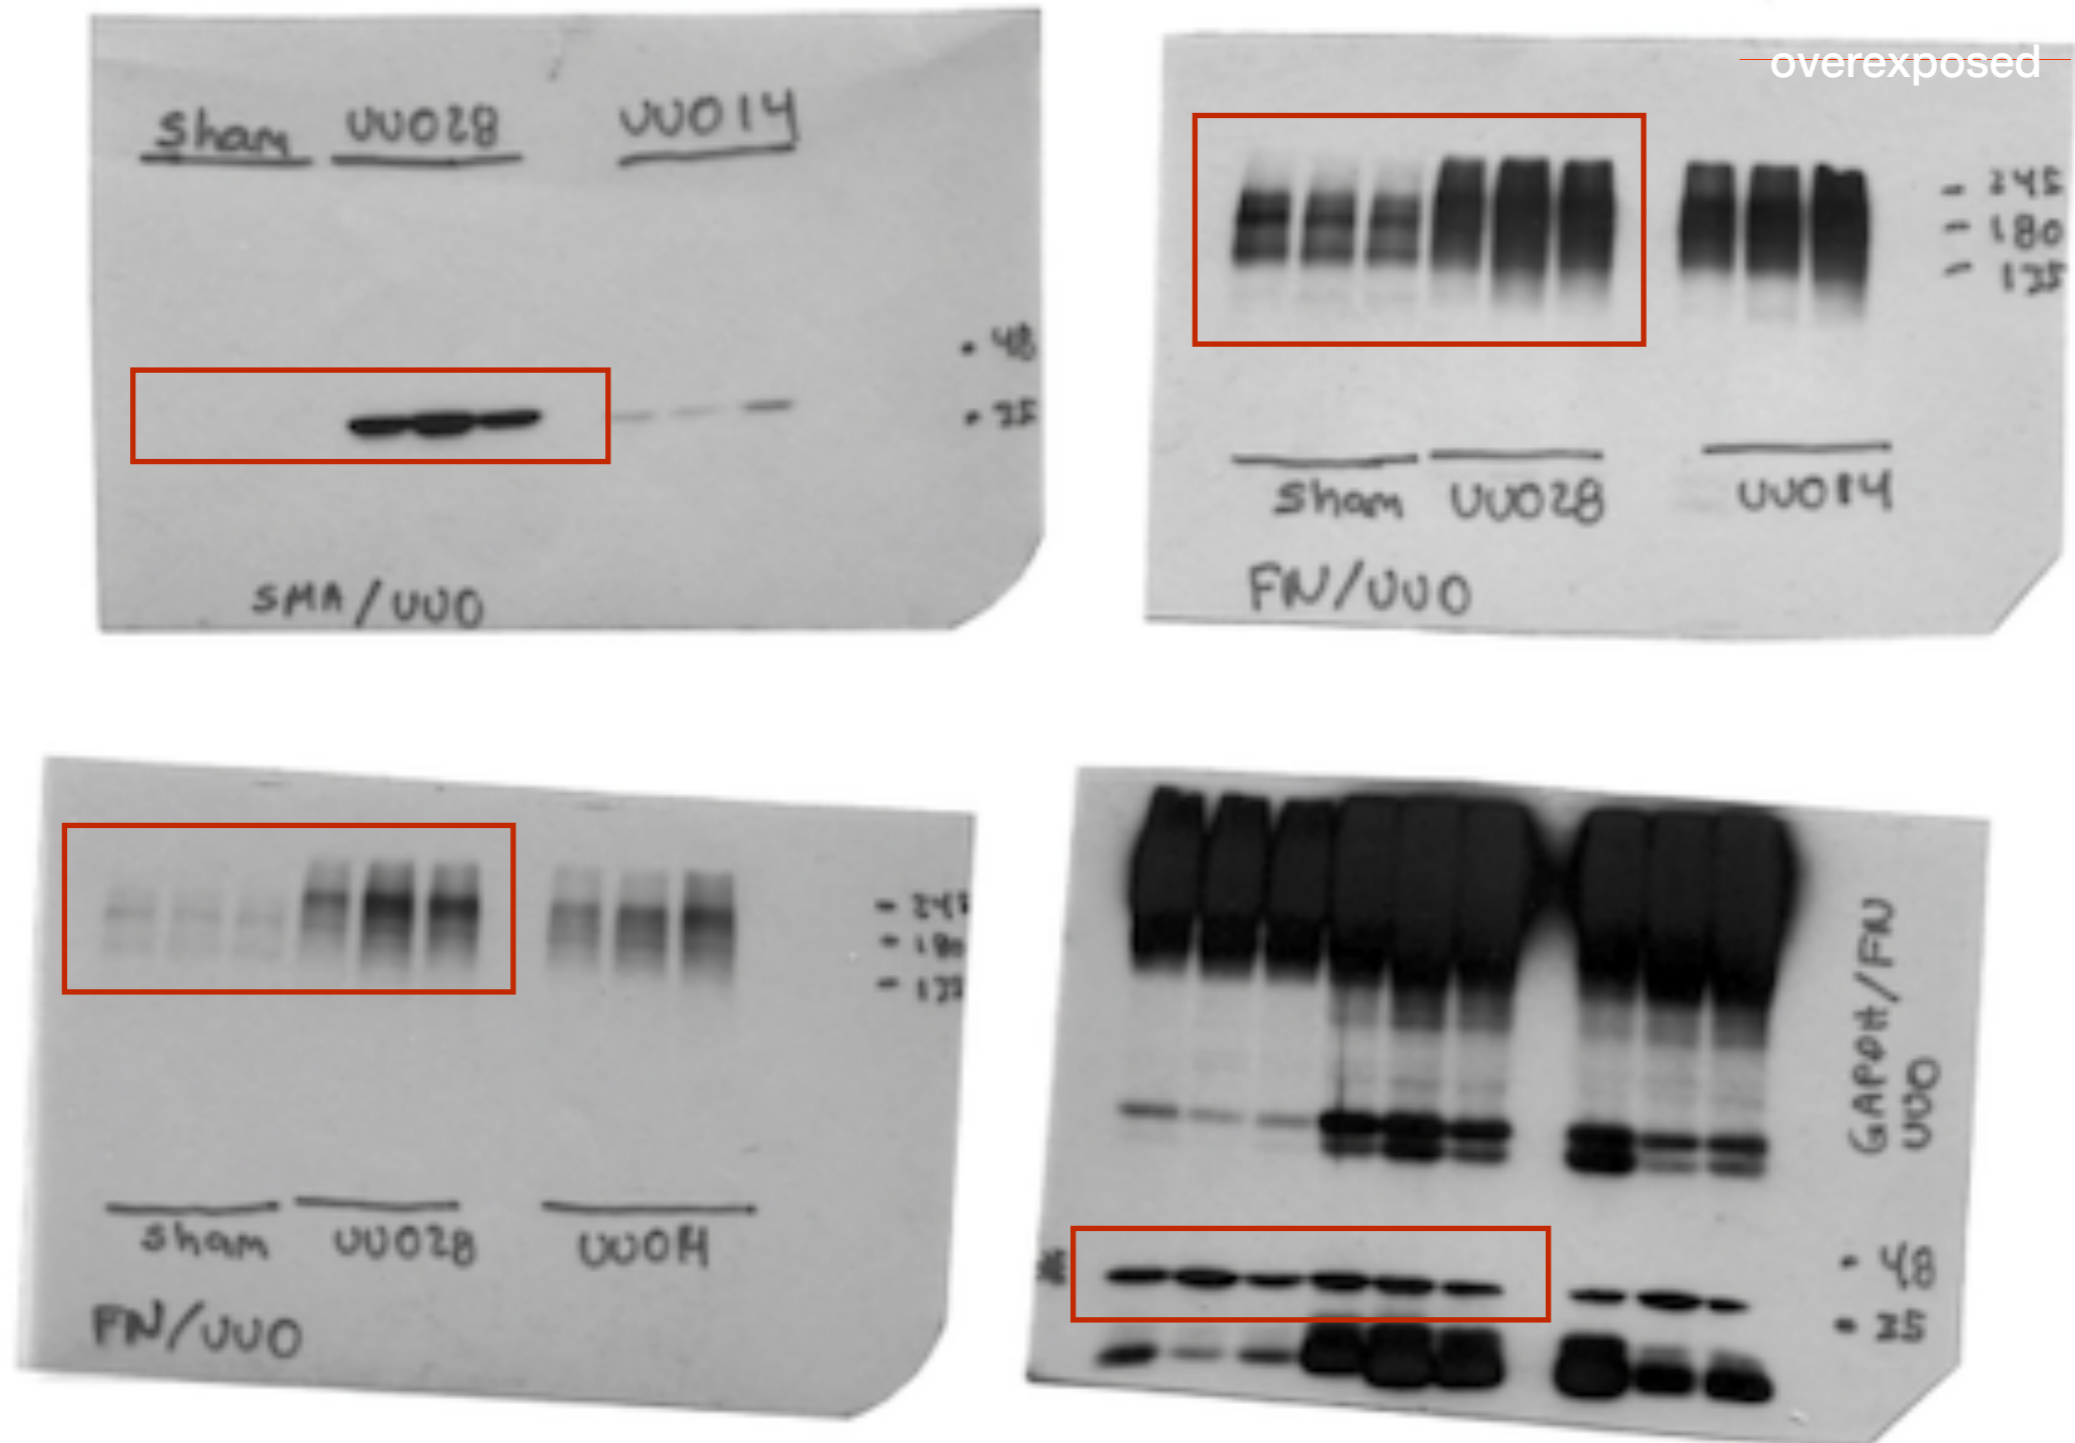

## Uncropped blots: heart markers

These immunoblots were used for the preparation of **Fig. 3A**

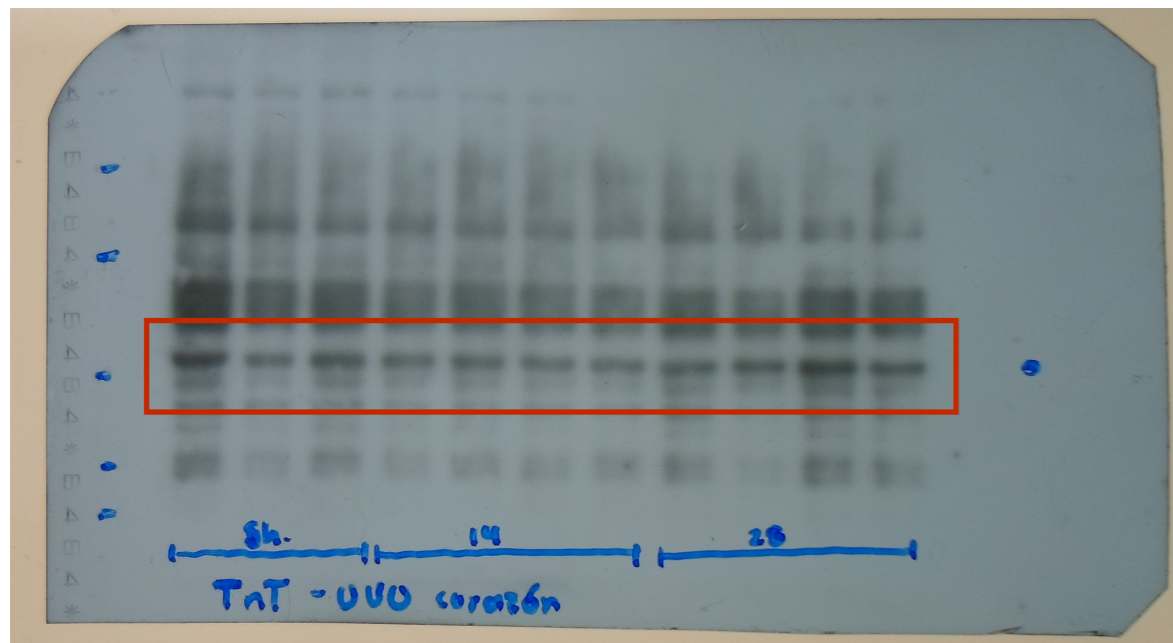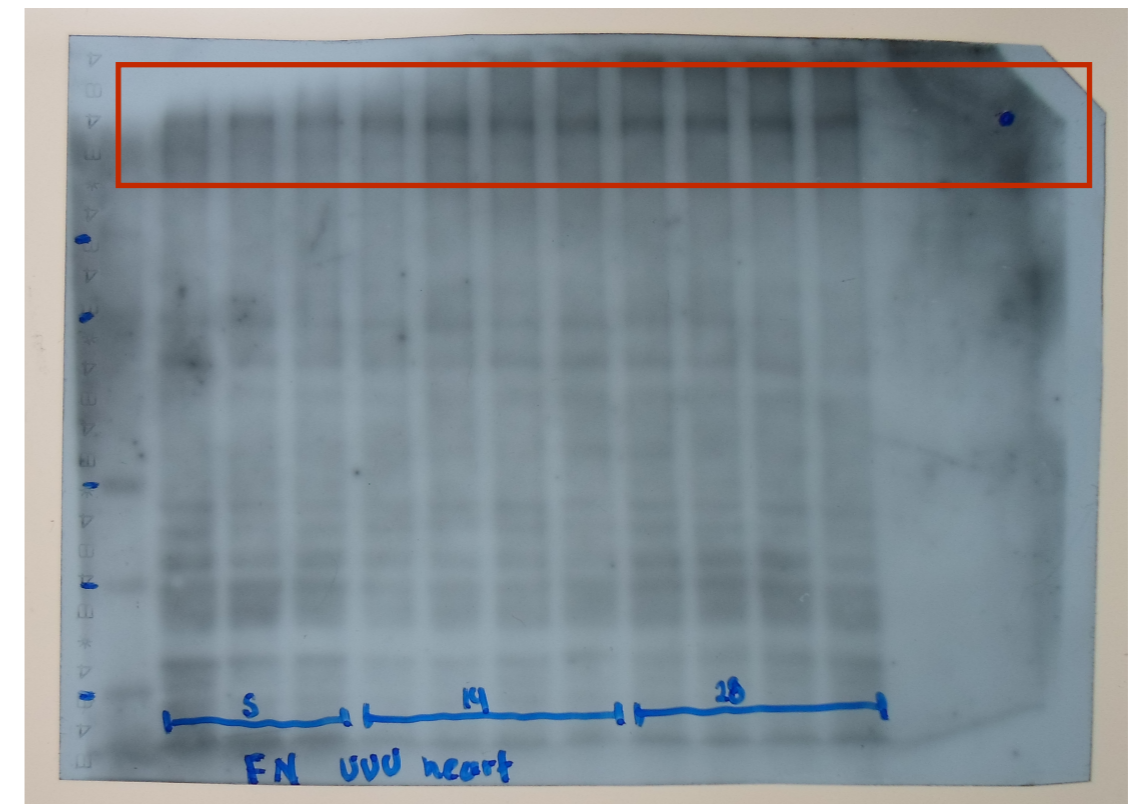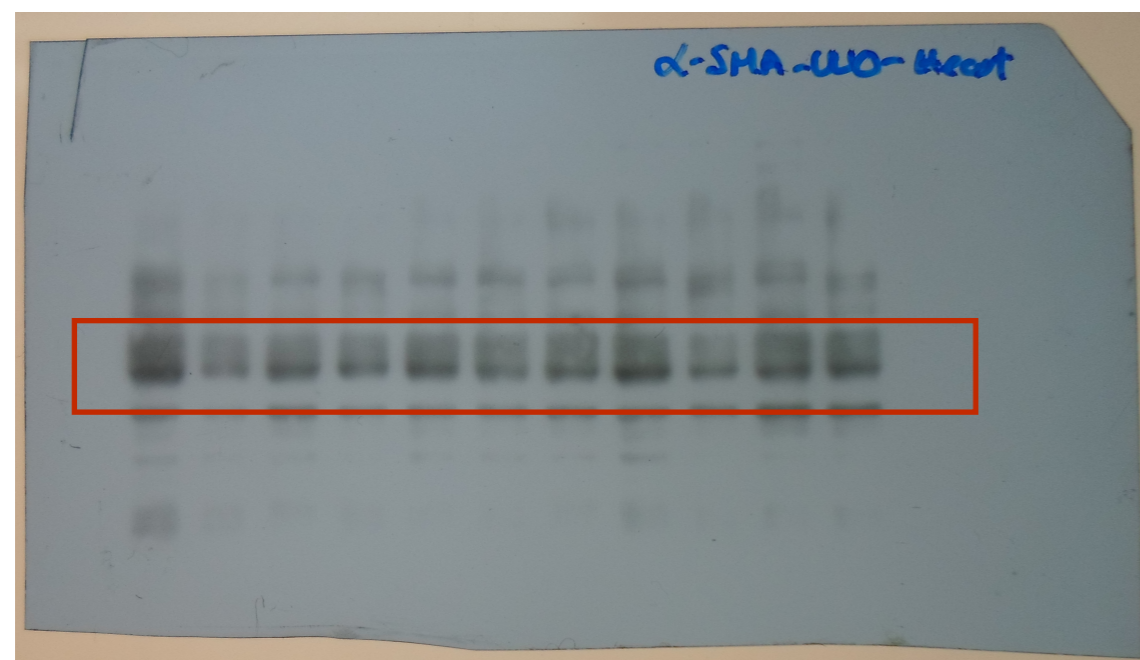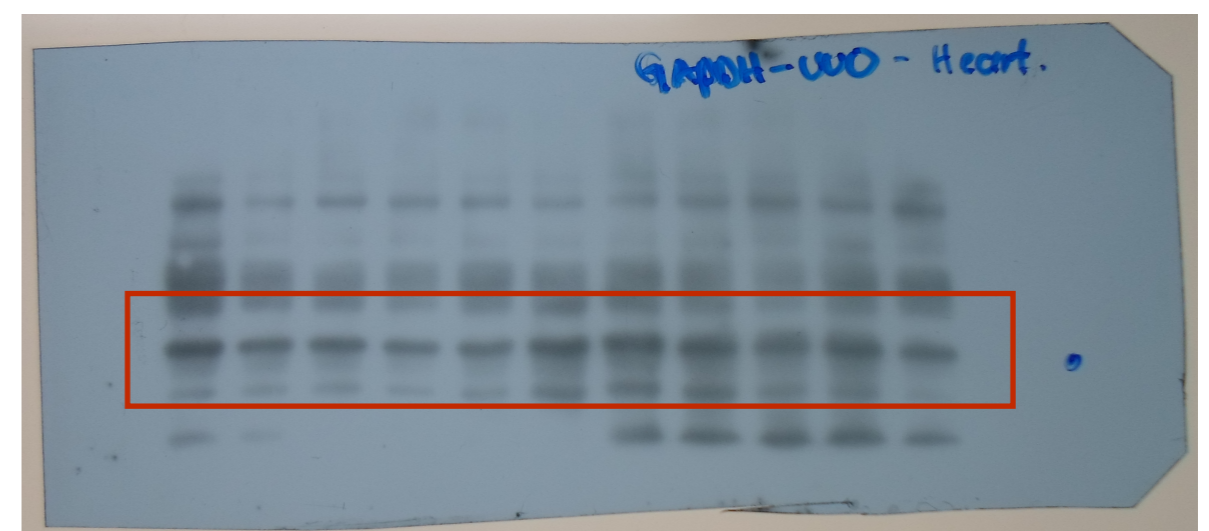

Supplement: s1 [file s1]
